# Supplementary figures and images for: Fecal microbiota transplantation alters the proteomic landscape of inflammation in HIV: identifying bacterial drivers
Source: PubMed Central journal article supplement — Microbiome. 2024 Oct 22;12:214. doi: 10.1186/s40168-024-01919-5 (PMC11494993; doi:10.1186/s40168-024-01919-5), 2024-10-22

Figure S1

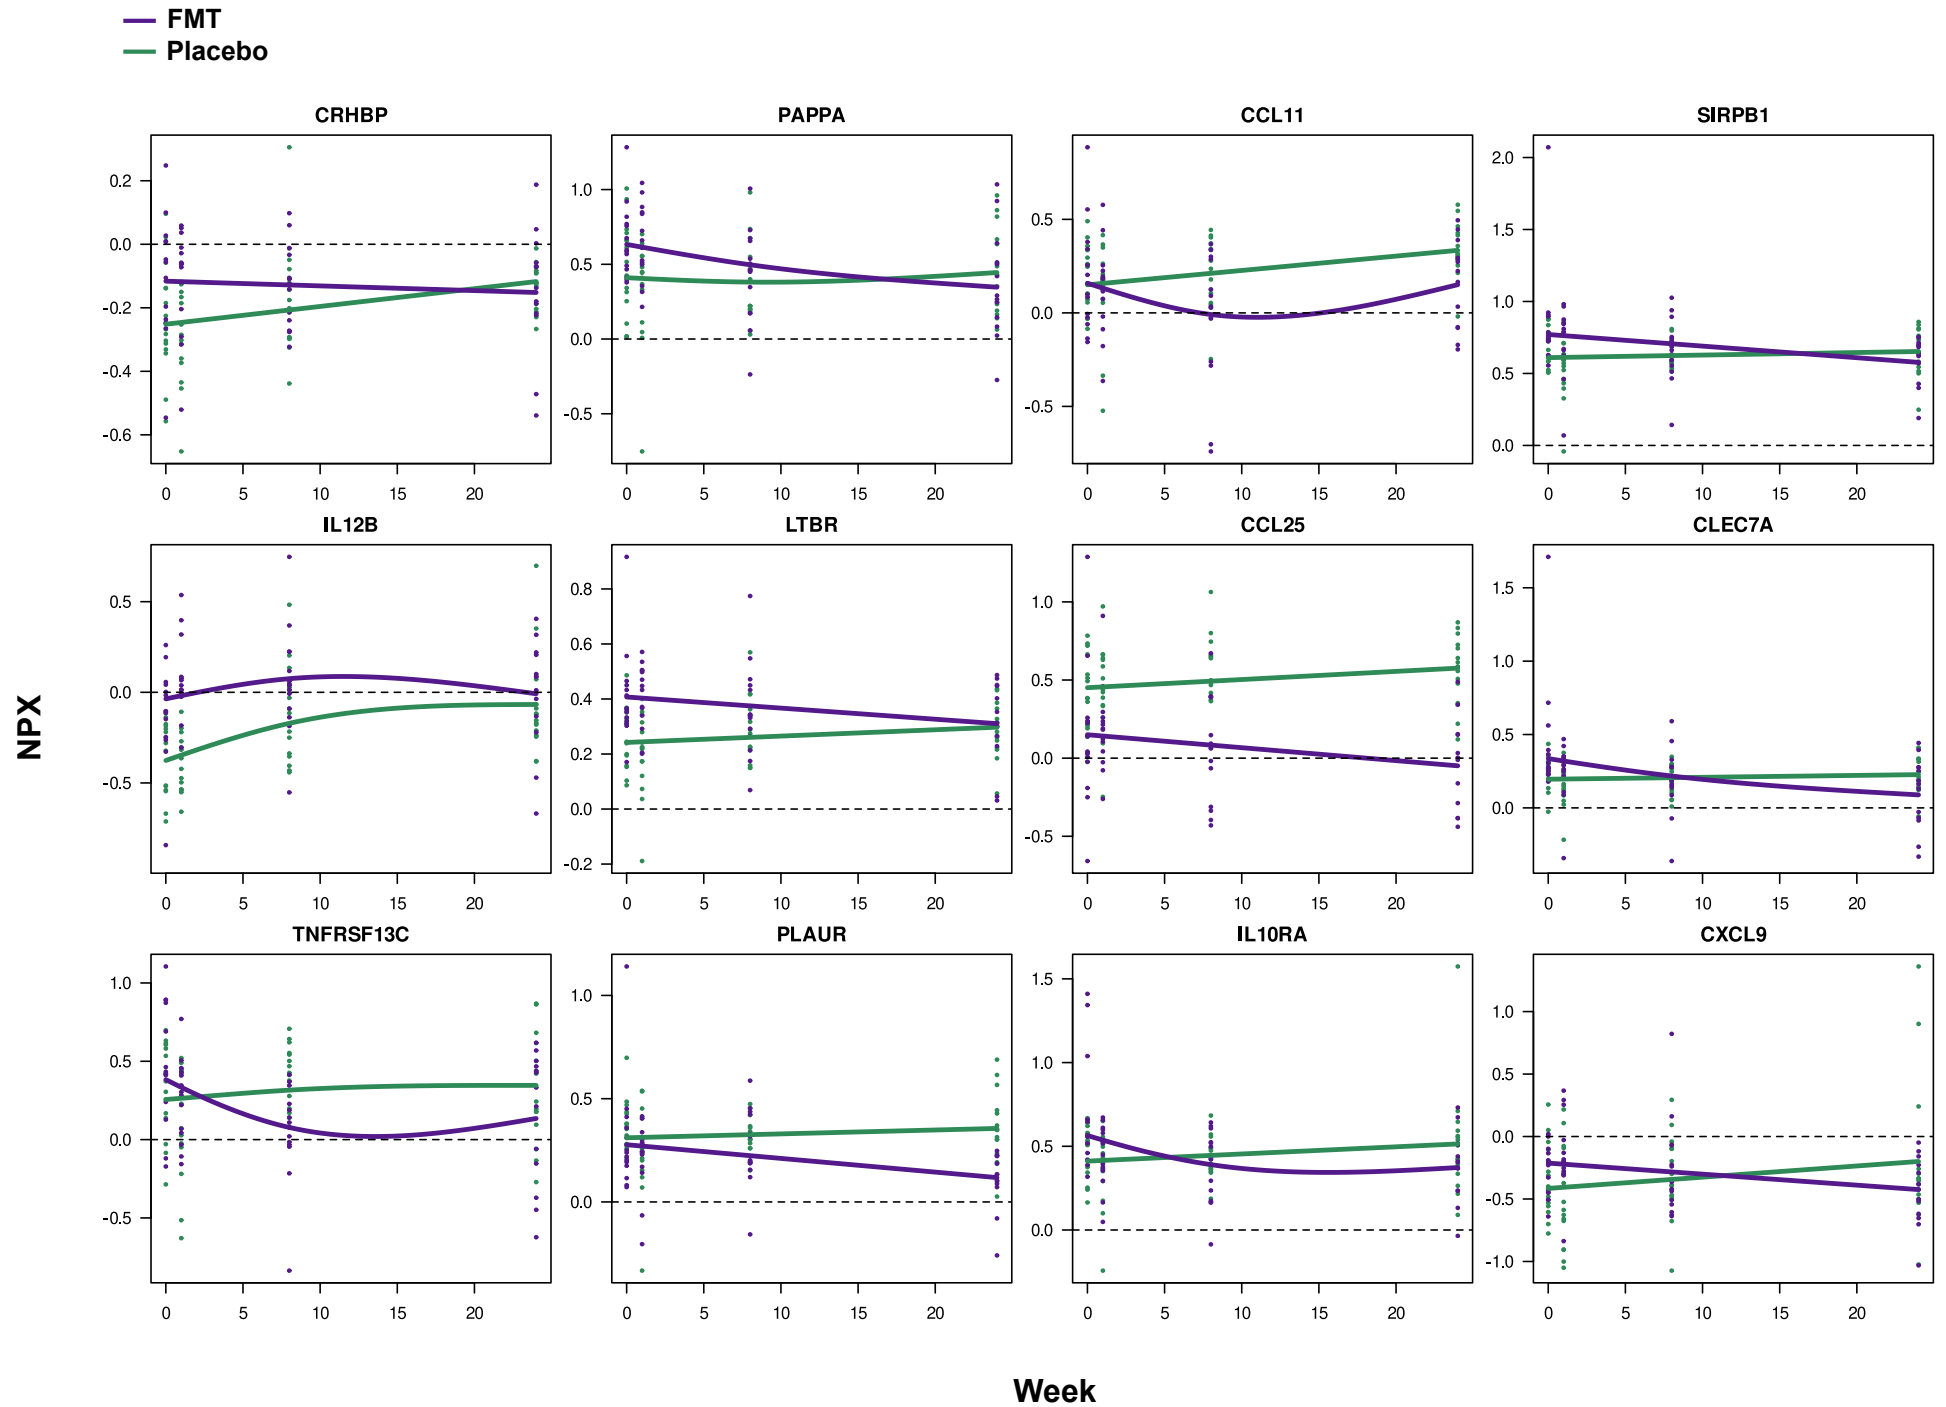

Supplement: 40168_2024_1919_MOESM17_ESM.pdf [file 40168_2024_1919_MOESM17_ESM.pdf]

Figure S2

FMT  
Placebo

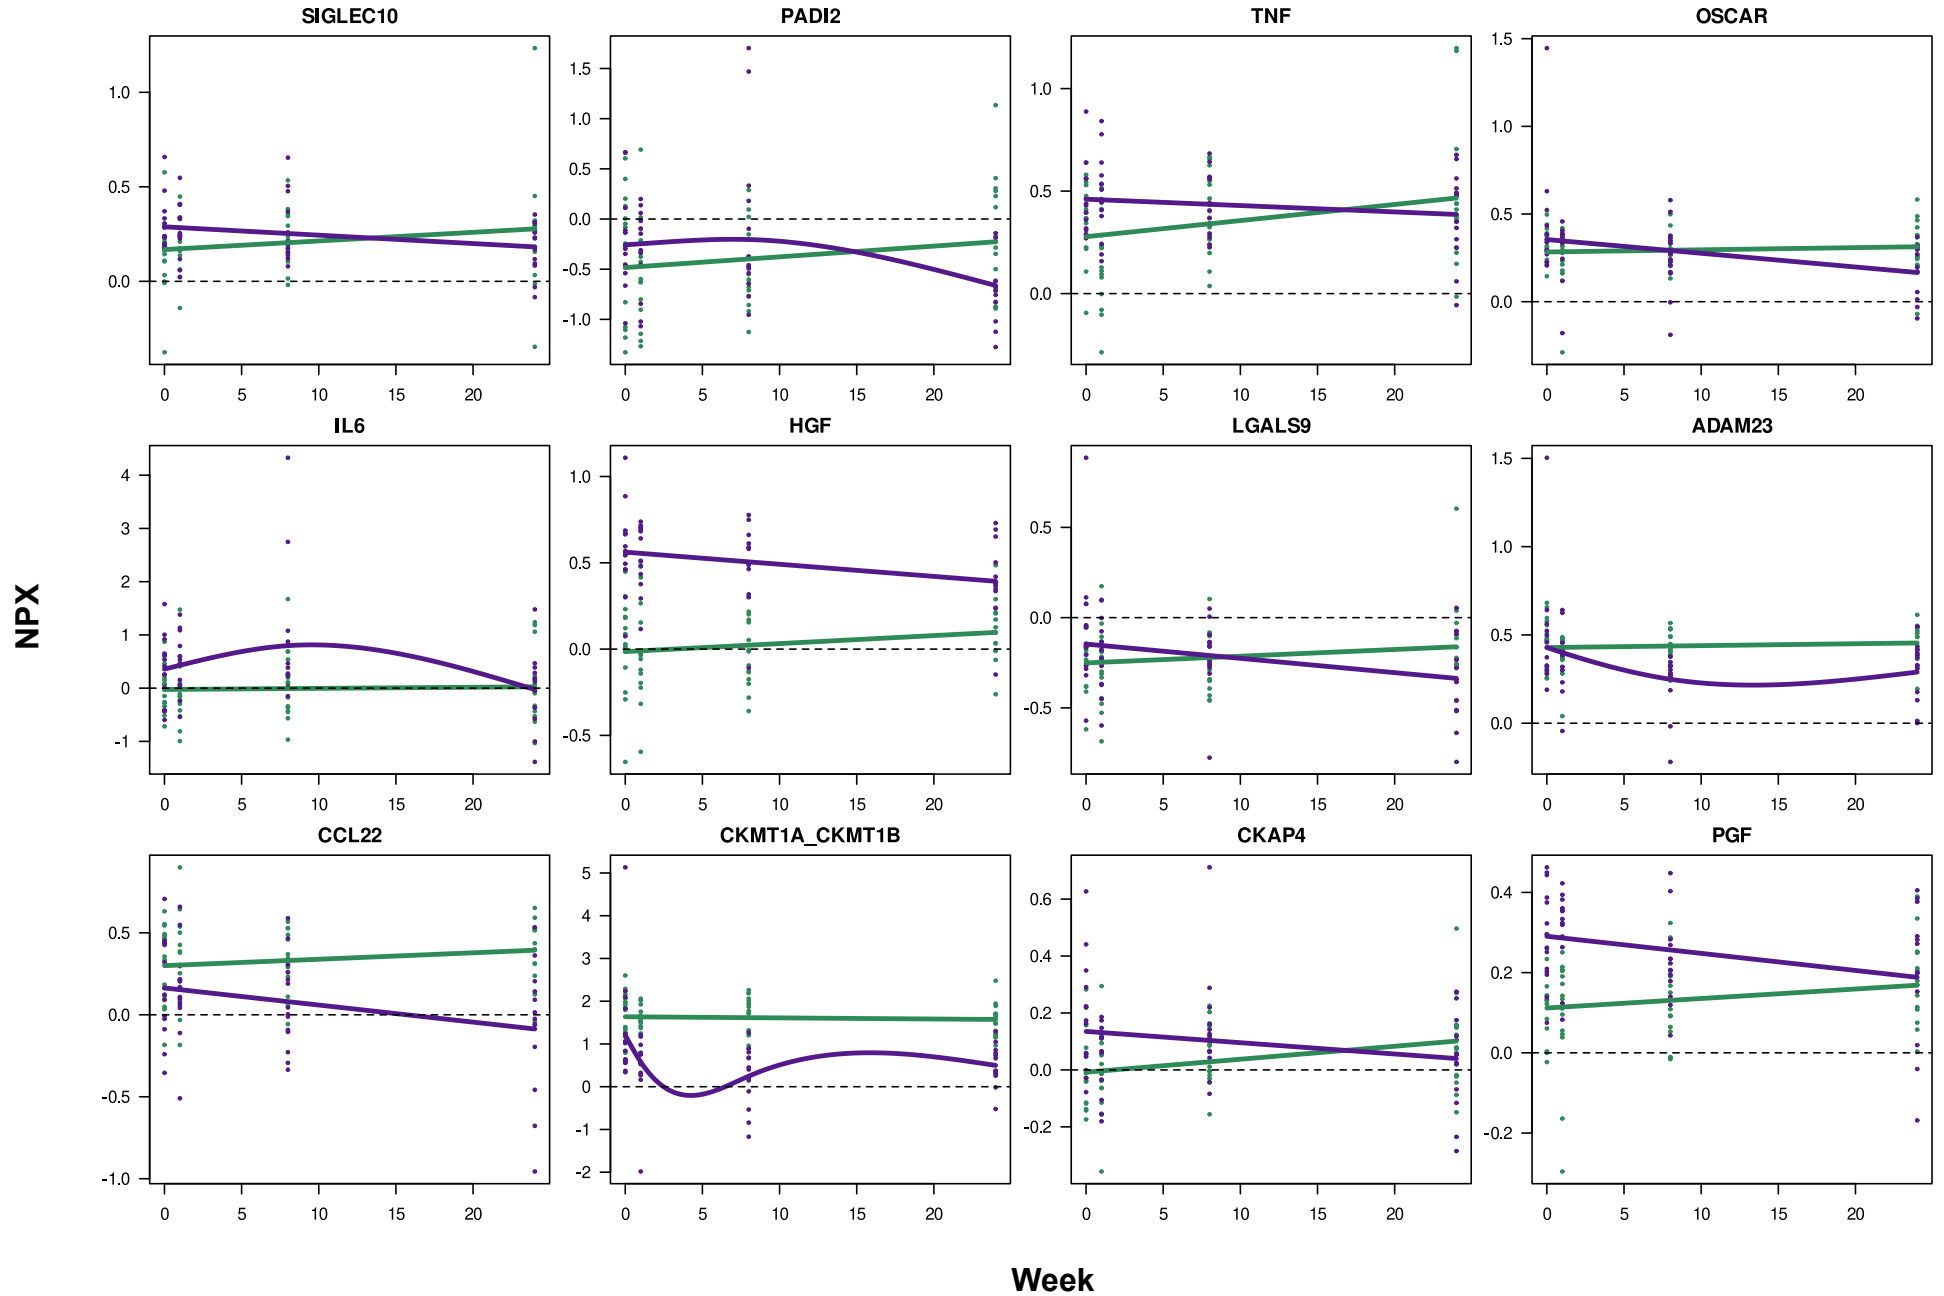

Supplement: 40168_2024_1919_MOESM18_ESM.pdf [file 40168_2024_1919_MOESM18_ESM.pdf]

Figure S3

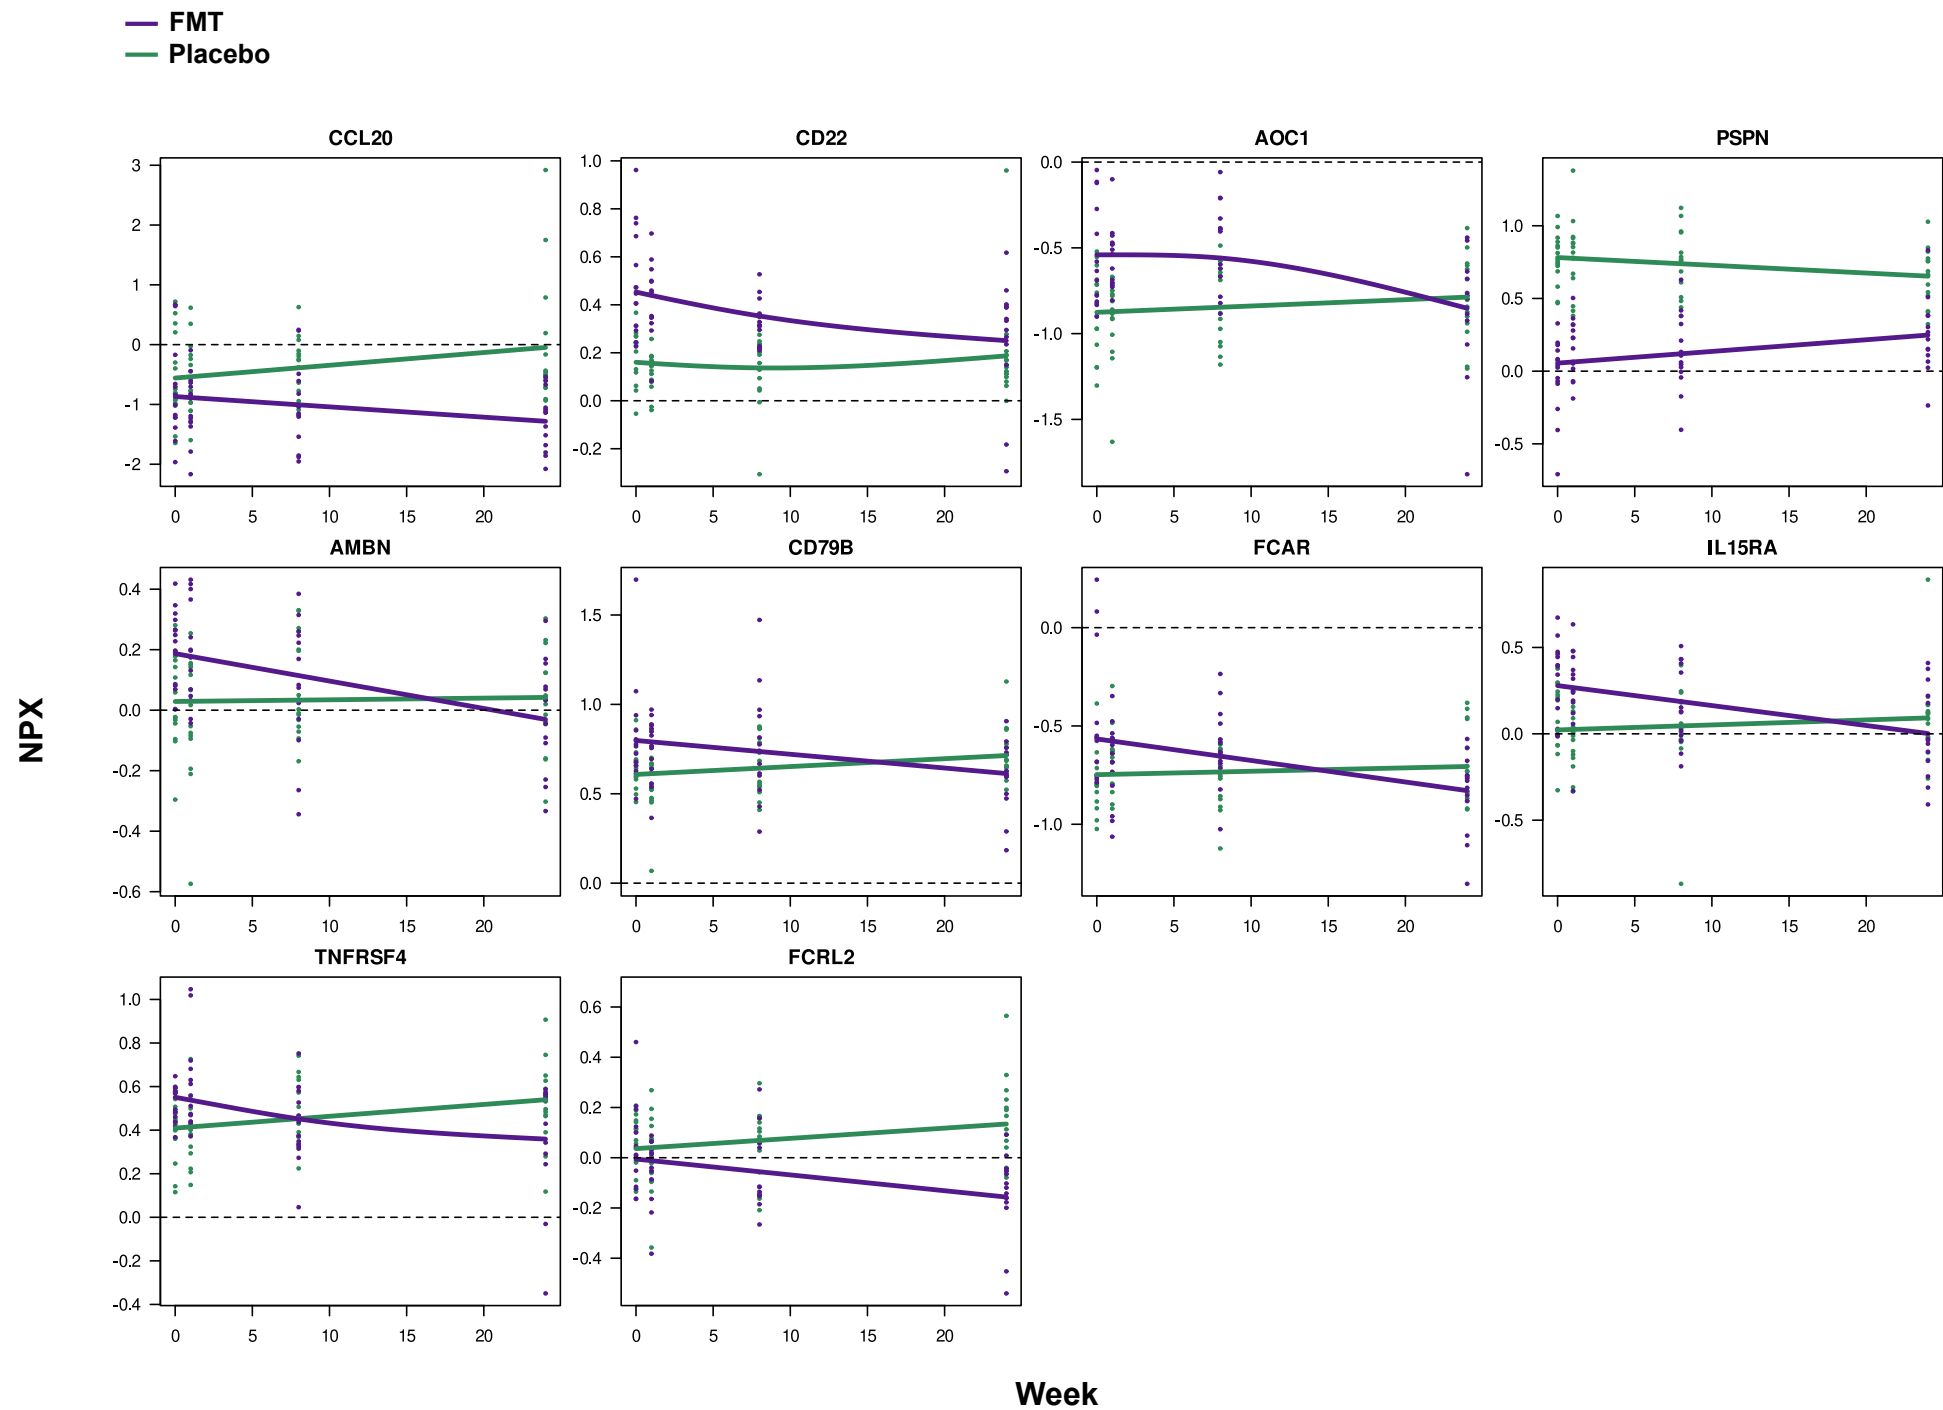

Supplement: 40168_2024_1919_MOESM19_ESM.pdf [file 40168_2024_1919_MOESM19_ESM.pdf]
